# Supplementary material for: Long-Term Outcomes of Japanese Type 2 Diabetic Patients With Biopsy-Proven Diabetic Nephropathy
Source: PubMed Central journal article supplement — Diabetes Care. 2013 Oct 15;36(11):3655–62. doi: 10.2337/dc13-0298 (PMC3816871; doi:10.2337/dc13-0298), 2013-10-15
Supplement: supp_dc13-0298v130298_DC130298SupplementaryData.pdf [file supp_dc13-0298v130298_DC130298SupplementaryData.pdf]

SUPPLEMENTARY DATA

**Supplementary Table 1.** Number (percentage) of patients according to albuminuria (proteinuria) and eGFR categories at the time of renal biopsy

| Category                                                    | Normoalbuminuria   | Microalbuminuria | Macroalbuminuria   |
|-------------------------------------------------------------|--------------------|------------------|--------------------|
|                                                             | Normal proteinuria | Mild proteinuria | Severe proteinuria |
|                                                             | (n=43, 16.5%)      | (n=55, 21.2%)    | (n=162, 62.3%)     |
| Urinary albumin (mg/day)                                    | < 30 (n=10)        | 30-299 (n=31)    | ≥ 300 (n=54)       |
| Urinary protein (g/day)                                     | < 0.15 (n=12)      | 0.15-0.49 (n=24) | ≥ 0.5 (n=105)      |
| Dipstick proteinuria                                        | (-, ±) (n=21)      | (1+) (n=0)       | ≥ (2+) (n=3)       |
| eGFR ≥ 60 ml/min/1.73 m <sup>2</sup> (n=106, 40.8%) (n (%)) | 28 (26.4%)         | 31 (29.2%)       | 47 (44.3%)         |
| eGFR < 60 ml/min/1.73 m <sup>2</sup> (n=154, 59.2%) (n (%)) | 15 (9.7%)          | 24 (15.6%)       | 115 (74.7%)        |

SUPPLEMENTARY DATA

**Supplementary Table 2.** Hazard ratios of renal events, cardiovascular events, and all-cause mortality for patients stratified by albuminuria (proteinuria) and eGFR categories estimated by the Cox proportional hazards model

| Renal events                                                                        |                 |                   |   |      |     |       |          |           |   |       |   |       |
|-------------------------------------------------------------------------------------|-----------------|-------------------|---|------|-----|-------|----------|-----------|---|-------|---|-------|
| Variables                                                                           | No. of Patients | No. of Events (%) |   |      |     | HR    | (95% CI) |           |   |       | P |       |
| All                                                                                 | 229             | 118               | ( | 51.5 | % ) |       |          |           |   |       |   |       |
| Normoalbuminuria (normal proteinuria) and eGFR $\geq$ 60 ml/min/1.73 m <sup>2</sup> | 24              | 4                 | ( | 16.7 | % ) | 1.00  | (        | Reference |   |       | ) |       |
| Normoalbuminuria (normal proteinuria) and eGFR < 60 ml/min/1.73 m <sup>2</sup>      | 14              | 1                 | ( | 7.1  | % ) | 0.83  | (        | 0.09      | - | 7.55  | ) | 0.87  |
| Microalbuminuria (mild proteinuria) and eGFR $\geq$ 60 ml/min/1.73 m <sup>2</sup>   | 27              | 10                | ( | 37.0 | % ) | 2.47  | (        | 0.77      | - | 7.91  | ) | 0.13  |
| Microalbuminuria (mild proteinuria) and eGFR < 60 ml/min/1.73 m <sup>2</sup>        | 21              | 7                 | ( | 33.3 | % ) | 2.27  | (        | 0.65      | - | 7.90  | ) | 0.20  |
| Macroalbuminuria (severe proteinuria) and eGFR $\geq$ 60 ml/min/1.73 m <sup>2</sup> | 37              | 25                | ( | 67.6 | % ) | 8.99  | (        | 3.07      | - | 26.37 | ) | <0.01 |
| Macroalbuminuria (severe proteinuria) and eGFR < 60 ml/min/1.73 m <sup>2</sup>      | 106             | 71                | ( | 67.0 | % ) | 20.82 | (        | 7.12      | - | 60.85 | ) | <0.01 |
| Cardiovascular events                                                               |                 |                   |   |      |     |       |          |           |   |       |   |       |
| Variables                                                                           | No. of Patients | No. of Events (%) |   |      |     | HR    | (95% CI) |           |   |       | P |       |
| All                                                                                 | 233             | 62                | ( | 26.6 | % ) |       |          |           |   |       |   |       |
| Normoalbuminuria (normal proteinuria) and eGFR $\geq$ 60 ml/min/1.73 m <sup>2</sup> | 25              | 6                 | ( | 24.0 | % ) | 1.00  | (        | Reference |   |       | ) |       |
| Normoalbuminuria (normal proteinuria) and eGFR < 60 ml/min/1.73 m <sup>2</sup>      | 14              | 3                 | ( | 21.4 | % ) | 1.43  | (        | 0.34      | - | 6.03  | ) | 0.63  |
| Microalbuminuria (mild proteinuria) and eGFR $\geq$ 60 ml/min/1.73 m <sup>2</sup>   | 27              | 7                 | ( | 25.9 | % ) | 1.03  | (        | 0.34      | - | 3.13  | ) | 0.95  |
| Microalbuminuria (mild proteinuria) and eGFR < 60 ml/min/1.73 m <sup>2</sup>        | 22              | 8                 | ( | 36.4 | % ) | 1.39  | (        | 0.46      | - | 4.14  | ) | 0.56  |
| Macroalbuminuria (severe proteinuria) and eGFR $\geq$ 60 ml/min/1.73 m <sup>2</sup> | 38              | 8                 | ( | 21.1 | % ) | 1.51  | (        | 0.51      | - | 4.48  | ) | 0.45  |
| Macroalbuminuria (severe proteinuria) and eGFR < 60 ml/min/1.73 m <sup>2</sup>      | 107             | 30                | ( | 28.0 | % ) | 3.11  | (        | 1.15      | - | 8.39  | ) | <0.05 |
| All-cause mortality                                                                 |                 |                   |   |      |     |       |          |           |   |       |   |       |

SUPPLEMENTARY DATA

| Variables                                                                           | No. of Patients | No. of Events (%) |   |      |     | HR   | (95% CI) |           |   |       | <i>P</i> |       |
|-------------------------------------------------------------------------------------|-----------------|-------------------|---|------|-----|------|----------|-----------|---|-------|----------|-------|
| All                                                                                 | 233             | 45                | ( | 19.3 | % ) |      |          |           |   |       |          |       |
| Normoalbuminuria (normal proteinuria) and eGFR $\geq$ 60 ml/min/1.73 m <sup>2</sup> | 25              | 3                 | ( | 12.0 | % ) | 1.00 | (        | Reference |   |       | )        |       |
| Normoalbuminuria (normal proteinuria) and eGFR < 60 ml/min/1.73 m <sup>2</sup>      | 14              | 1                 | ( | 7.1  | % ) | 0.58 | (        | 0.06      | - | 5.70  | )        | 0.64  |
| Microalbuminuria (mild proteinuria) and eGFR $\geq$ 60 ml/min/1.73 m <sup>2</sup>   | 27              | 3                 | ( | 11.1 | % ) | 0.60 | (        | 0.12      | - | 3.05  | )        | 0.54  |
| Microalbuminuria (mild proteinuria) and eGFR < 60 ml/min/1.73 m <sup>2</sup>        | 22              | 2                 | ( | 9.1  | % ) | 0.37 | (        | 0.06      | - | 2.26  | )        | 0.28  |
| Macroalbuminuria (severe proteinuria) and eGFR $\geq$ 60 ml/min/1.73 m <sup>2</sup> | 38              | 7                 | ( | 18.4 | % ) | 2.37 | (        | 0.61      | - | 9.24  | )        | 0.22  |
| Macroalbuminuria (severe proteinuria) and eGFR < 60 ml/min/1.73 m <sup>2</sup>      | 107             | 29                | ( | 27.1 | % ) | 5.87 | (        | 1.62      | - | 21.25 | )        | <0.01 |

Data are hazard ratios (95% CI). Hazard ratios are adjusted for age and gender. The group of patients with normoalbuminuria (normal proteinuria) and eGFR  $\geq$  60 ml/min/1.73 m<sup>2</sup> served as a reference group.

SUPPLEMENTARY DATA

**Supplementary Figure 1.** Representative microscopic findings of glomerular and vascular lesions in diabetic nephropathy

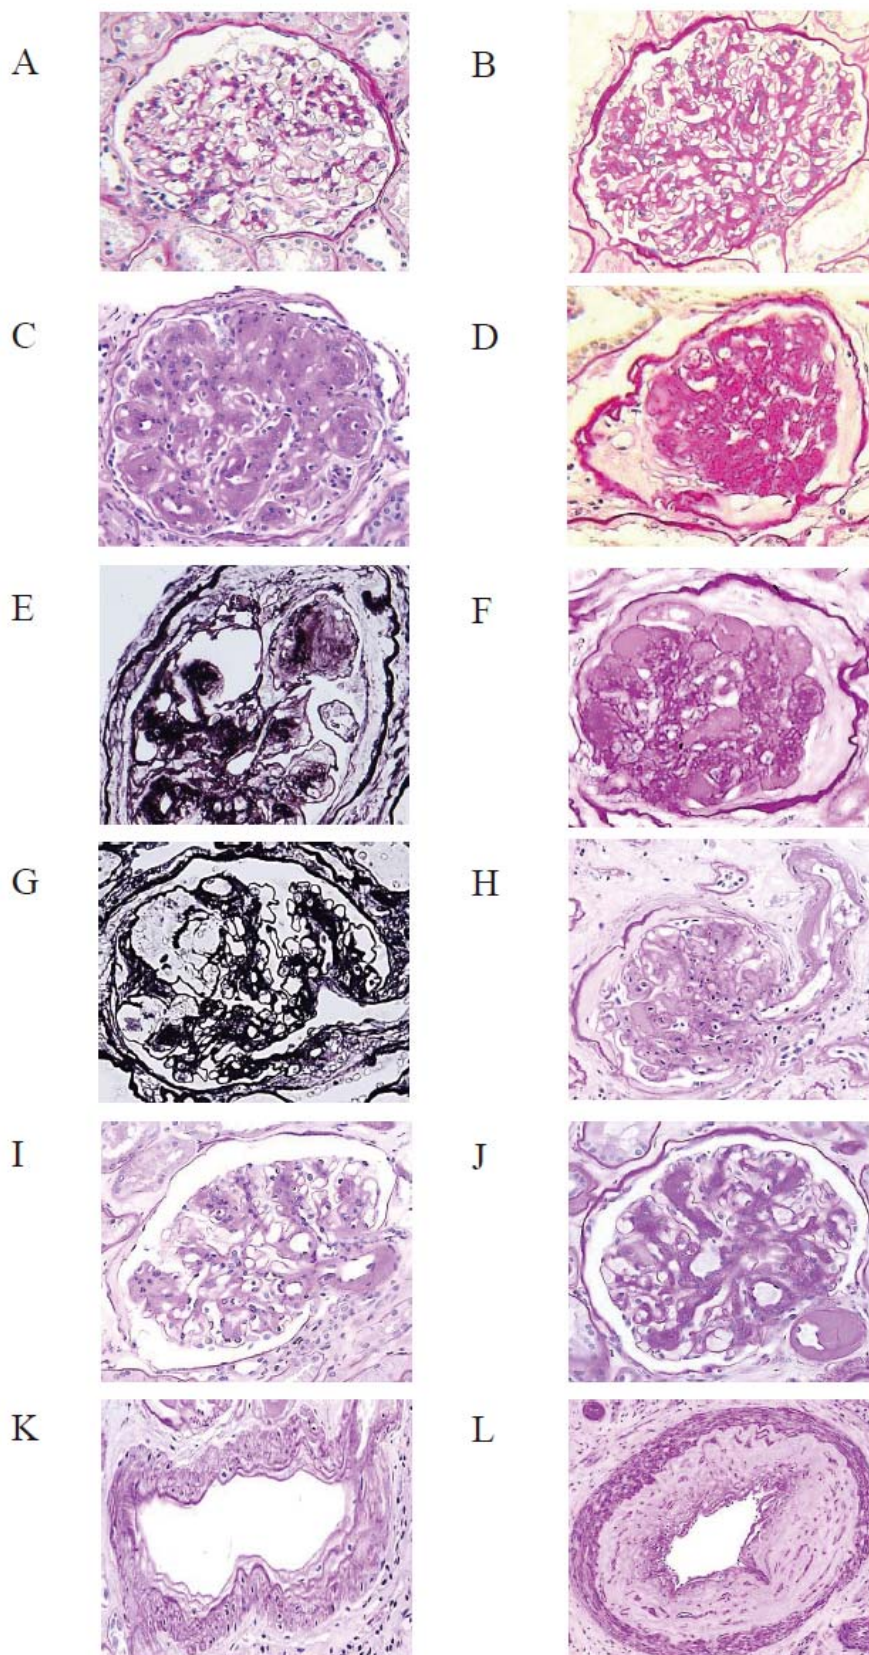

## SUPPLEMENTARY DATA

Panels A, B, C, and D show various grades of diffuse lesions. Panel A shows Grade 1 of diffuse diabetic glomerulosclerosis. The lesion is local within each glomerulus and focal within the kidney (PAS stain  $\times 200$ ). Panel B shows Grade 2 of diffuse diabetic glomerulosclerosis. Mesangial thickening is diffuse within the glomerulus and generalized throughout the kidney (PAS stain  $\times 200$ ). Panel C shows Grade 3 of diffuse diabetic glomerulosclerosis. The capillary lumina are narrowed and only locally obliterated (PAS stain  $\times 200$ ). Panel D shows Grade 4 of diffuse diabetic glomerulosclerosis. There is general luminal narrowing. The whole glomerulus has become ischemic and appears to be hyalinized (PAS stain  $\times 200$ ). Panel E shows the glomerulus with nodular lesions (PAM stain  $\times 200$ ). Panel F shows the glomerulus with exudative lesions (PAS stain  $\times 200$ ). Panel G shows the glomerulus with mesangiolytic lesions (PAM stain  $\times 200$ ). Panels H, I, J, K, and L show various grades of vascular lesions. Panel H shows Grade 1 of arteriolar hyaline arteriosclerosis. A light PAS-positive thickening is observed but less than half of the circumference of the arteriole in many arterioles (PAS stain  $\times 200$ ). Panel I shows Grade 2 of arteriolar hyaline arteriosclerosis. Most vessel walls are moderately thickened with PAS-positive deposition without apparent luminal narrowing (PAS stain  $\times 200$ ). Panel J shows Grade 3 of arteriolar hyaline arteriosclerosis. A heavy thickening of the majority of the vessel walls is seen with luminal narrowing or obliteration (PAS stain  $\times 200$ ). Panel K shows Grade 1 of arteriosclerosis. Intimal thickening is less than the media thickness (PAS stain  $\times 200$ ). Panel L shows Grade 2 of arteriosclerosis. Intimal thickening is greater than the media thickness (PAS stain  $\times 200$ ).

**Supplementary Figure 2.** Representative microscopic findings of patients with low eGFR classified based on the absence or presence of albuminuria

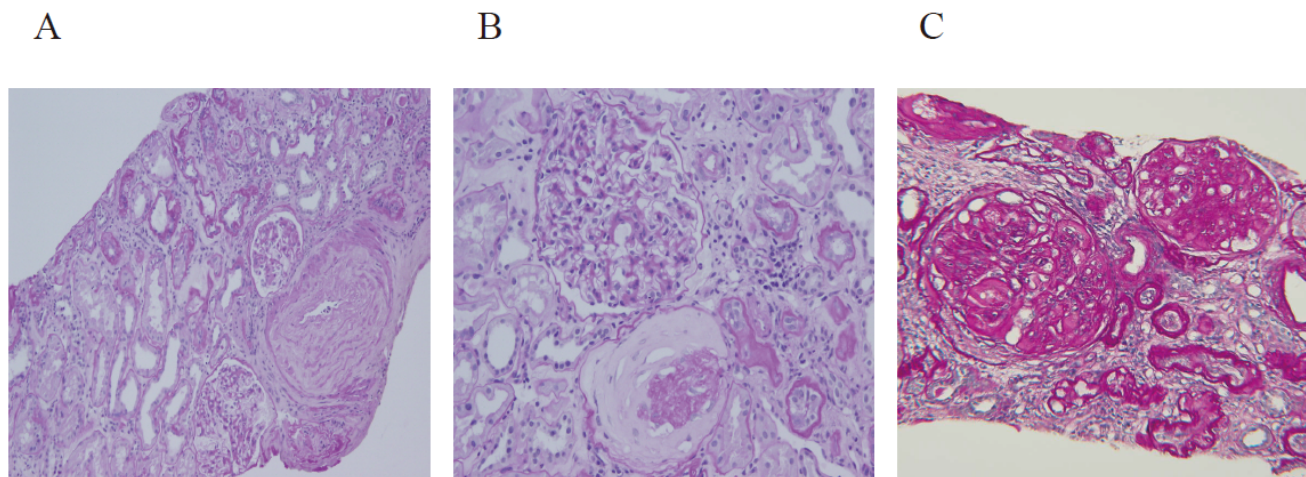

Panels A and B show representative microscopic findings of patients with low eGFR and normoalbuminuria. Panel A shows mild diffuse diabetic glomerulosclerosis associated with disproportionately severe arteriosclerosis and moderate to severe tubulointerstitial lesions (PAS stain  $\times 100$ ). Panel B shows mild diffuse diabetic glomerulosclerosis and global glomerular sclerosis (PAS stain  $\times 200$ ). Panel C shows representative microscopic finding of patients with low eGFR and macroalbuminuria. Advanced glomerular lesions (diffuse and exudative lesions) associated with severe tubulointerstitial lesions are shown (PAS stain  $\times 100$ ).
